# Supplementary material
Source: PubMed Central journal article supplement (PMC1150264)
Supplement: cmaj_172_13_1700__1.pdf [file cmaj_172_13_1700__1.pdf]

# Cet essai clinique est-il entièrement inscrit? Déclaration du Comité international des rédacteurs de revues médicales

**Catherine D. De Angelis, Jeffrey M. Drazen, Frank A. Frizelle, Charlotte Haug, John Hoey, Richard Horton, Sheldon Kotzin, Christine Laine, Ana Marušić, A. John P.M. Overbeke, Torben V. Schroeder, Harold C. Sox, Martin B. Van Der Weyden**

**E**n septembre 2004, les membres du Comité international des rédacteurs de revues médicales (CIRRM) ont publié un éditorial conjoint afin de promouvoir l'inscription de tous les essais cliniques<sup>1</sup>. Nous avons déclaré que nous envisagerons de publier les résultats d'un essai seulement s'il a été inscrit avant le recrutement du premier patient. Cette politique s'applique aux essais qui commencent à recruter à compter du 1<sup>er</sup> juillet 2005. Comme beaucoup d'essais en cours n'ont pas été inscrits au début, nous envisagerons de publier les résultats d'essais en cours inscrits avant le 13 septembre 2005. Notre but était et demeure de favoriser la création d'une base de données publique complète sur les essais cliniques. Un registre complet des essais serait une bonne façon de remercier les milliers de personnes qui se sont mises en danger en participant volontairement à des essais cliniques. Ces participants méritent de savoir que l'information accumulée grâce à leur altruisme est publique et où elle est disponible pour guider les décisions sur le soin des patients. Ils méritent aussi de savoir que les décisions au sujet de leurs soins reposent sur l'ensemble des données probantes et non seulement sur les essais que leurs auteurs décident de déclarer et dont les rédacteurs de journaux décident de publier les résultats.

Nous ne sommes pas les seuls à viser ce but. En organisant des réunions à New York, Mexico et Genève, l'Organisation mondiale de la santé (OMS) nous a rapprochés du but que constitue une seule norme mondiale sur l'information que les auteurs d'essais cliniques doivent divulguer. Des gouvernements du monde entier commencent à imposer par la loi la divulgation obligatoire de tous les essais. Le Congrès américain, par exemple, où la Fair Access to Clinical Trials (FACT) Act proposée étendrait le mandat actuel qui régit l'inscription des essais cliniques, est au nombre des entités qui envisagent une nouvelle loi. Beaucoup d'autres journaux ont adopté une politique d'inscription obligatoire des essais. Ces initiatives montrent que l'inscription des essais est devenue un enjeu public. Comme la date limite d'inscription approche, les auteurs et les commanditaires des essais veulent toutefois s'assurer qu'ils compren-

nent nos exigences afin de pouvoir soumettre à la rédaction les rapports sur leurs recherches. Cet éditorial conjoint et publié simultanément vise à répondre à des questions sur l'initiative du CIRRM et à harmoniser notre position avec celle d'autres intervenants qui visent le même but.

Notre définition d'un essai clinique demeure essentiellement la même que dans notre éditorial de septembre 2004 : «Tout projet de recherche qui affecte de façon prospective des sujets humains à des groupes d'intervention et de comparaison afin d'étudier la relation de cause à effet entre un acte médical et l'évolution d'un état de santé.» Par «acte médical», nous entendons tout acte posé pour modifier l'évolution d'un état de santé. Cette définition inclut les médicaments, interventions chirurgicales, dispositifs, traitements comportementaux, modifications du processus de soins, etc. Nous mettons à jour notre éditorial de 2004 pour indiquer qu'un essai doit comporter au moins un groupe témoin ou de comparaison simultané dont les membres sont affectés de façon prospective afin de déclencher l'obligation d'inscrire l'essai.

Parmi les essais conformes à cette définition, lesquels faut-il inscrire? Le CIRRM veut garantir au public l'accès à tous les essais «cliniquement directifs» — soit les essais qui vérifient une hypothèse clinique au sujet de l'évolution d'états de santé (p. ex., «Le médicament X est-il aussi efficace que le médicament Y contre l'insuffisance cardiaque?»). Notre obligation d'inscrire ne s'applique aux essais qui visent principalement à évaluer une toxicité inconnue importante ou à déterminer la pharmacocinétique (essais de la phase 1). Par contre, nous croyons que le public mérite de connaître l'existence d'essais qui pourraient modifier le corpus de données probantes sur l'efficacité clinique ou sur des effets indésirables. C'est pourquoi nous exigeons que l'on inscrive tous les essais qui visent principalement à avoir un effet sur la pratique clinique (essais de la phase 3). On trouve entre ces deux extrêmes des essais cliniques dont le but prédéterminé est d'étudier la biologie d'une maladie ou de produire des données préliminaires qui peuvent déboucher sur des essais cliniquement directifs de plus grande envergure.

Nous reconnaissons que le fait d'exiger l'inscription publique d'essais dont le but prédéterminé consiste à étudier la biologie d'une maladie ou à orienter d'autres

An English version of this article is available at [www.cmaj.ca](http://www.cmaj.ca)

recherches pourrait ralentir les forces motrices de l'innovation. C'est pourquoi le rédacteur de chaque journal décidera dans chaque cas d'évaluer ou non les essais non inscrits dans cette catégorie. Les auteurs dont l'essai n'est pas inscrit devront convaincre le rédacteur qu'ils avaient une raison solide lorsqu'ils ont décidé de ne pas inscrire leur étude. Le CIRRM maintiendra cette politique pendant les deux prochaines années et nous évaluerons alors notre expérience.

Nous avons précisé dans notre éditorial de septembre 2004 les renseignements que nous exigerions pour l'inscription des essais. Les participants présents à une récente réunion du Groupe consultatif de l'OMS sur l'inscription ont défini un ensemble de données minimal sur l'inscription qui compte 20 éléments de données (tableau 1). Les éléments imposés par l'OMS portent collectivement sur chaque exigence clé que nous avons établie dans notre éditorial de septembre 2004. Le CIRRM appuie l'ensemble de

**Tableau 1 : Ensemble de données minimal sur l'inscription\***

| Élément                                      | Commentaire                                                                                                                                                                                                                                                                                                                                                        |
|----------------------------------------------|--------------------------------------------------------------------------------------------------------------------------------------------------------------------------------------------------------------------------------------------------------------------------------------------------------------------------------------------------------------------|
| 1. Numéro d'essai unique                     | Le numéro d'essai unique sera déterminé par la principale entité d'inscription (le registre).                                                                                                                                                                                                                                                                      |
| 2. Date d'inscription de l'essai             | La date d'inscription sera déterminée par la principale entité d'inscription.                                                                                                                                                                                                                                                                                      |
| 3. ID secondaires                            | Peuvent être attribués par les commanditaires ou d'autres parties intéressées (il peut n'y en avoir aucun).                                                                                                                                                                                                                                                        |
| 4. Source(s) de financement                  | Nom des organismes qui ont fourni du financement pour l'étude.                                                                                                                                                                                                                                                                                                     |
| 5. Commanditaire principal                   | Principale entité chargée d'effectuer la recherche.                                                                                                                                                                                                                                                                                                                |
| 6. Commanditaire(s) secondaire(s)            | Les entités secondaires, s'il en est, chargées d'effectuer la recherche.                                                                                                                                                                                                                                                                                           |
| 7. Personne-ressource responsable            | Personne qui assure les contacts avec le public pour l'essai, pour les patients intéressés à y participer.                                                                                                                                                                                                                                                         |
| 8. Personne-ressource pour la recherche      | Personne avec laquelle il faut communiquer pour obtenir des renseignements scientifiques sur l'essai.                                                                                                                                                                                                                                                              |
| 9. Titre de l'étude                          | Bref titre choisi par le groupe de travail (il est possible de l'omettre si les chercheurs le souhaitent).                                                                                                                                                                                                                                                         |
| 10. Titre scientifique officiel de l'étude   | Ce titre doit inclure le nom de l'acte, le problème étudié et le résultat (p. ex., Étude d'intervention sur la Digoxine et la mort causée par l'insuffisance cardiaque globale).                                                                                                                                                                                   |
| 11. Examen de l'éthique de la recherche      | Au moment de l'inscription, l'étude avait-elle reçu l'approbation appropriée du comité d'éthique (oui/non)? (On suppose qu'un comité d'éthique aura approuvé au préalable tous les essais inscrits.)                                                                                                                                                               |
| 12. Problème                                 | Problème médical à l'étude (p. ex., asthme, infarctus du myocarde, dépression).                                                                                                                                                                                                                                                                                    |
| 13. Acte(s)                                  | Description de l'étude et des actes de comparaison ou témoins. (Dans le cas d'un médicament ou autre produit homologué pour vente publique n'importe où dans le monde, il s'agit du nom générique; dans le cas d'un médicament non homologué, le nom générique ou le numéro de série de l'entreprise est acceptable.) Il faut préciser la durée des interventions. |
| 14. Critères clés d'inclusion et d'exclusion | Caractéristiques clés des patients qui déterminent leur admissibilité à l'étude.                                                                                                                                                                                                                                                                                   |
| 15. Type d'étude                             | La base de données devrait fournir des listes déroulantes permettant de choisir randomisé ou non randomisé, le type de masquage (p. ex., double insu, simple insu), le type de témoin (p. ex., placebo, substance active) et l'affectation au groupe (p. ex., parallèle, croisée, factorielle).                                                                    |
| 16. Date prévue du début de l'essai          | Date estimative du recrutement du premier participant.                                                                                                                                                                                                                                                                                                             |
| 17. Taille de l'échantillon visé             | Nombre total de sujets que les chercheurs prévoient recruter avant de fermer l'essai aux nouveaux participants.                                                                                                                                                                                                                                                    |
| 18. Statut du recrutement                    | Ces renseignements sont-ils disponibles (oui/non) (le cas échéant, lien avec l'information).                                                                                                                                                                                                                                                                       |
| 19. Résultat principal                       | Le résultat principal que l'étude devait évaluer. La description devrait inclure le moment auquel on mesure le résultat (p. ex., tension artérielle à 12 mois).                                                                                                                                                                                                    |
| 20. Principaux résultats secondaires         | Résultats secondaires précisés dans le protocole. La description devrait inclure le moment où l'on prend la mesure (p. ex., clairance de la créatinine à six mois).                                                                                                                                                                                                |

\*Les zones de données ont été définies au cours d'une réunion convoquée par l'Organisation mondiale de la santé en avril 2004. Les commentaires explicatifs proviennent en grande partie du Comité international des rédacteurs de revues médicales.

données minimal de l'OMS, qu'il a adopté comme exigence : nous étudierons un essai en vue de le publier si les auteurs l'inscrivent dès le départ en remplissant les 20 champs de l'ensemble de données minimal de l'OMS. Comme rédacteurs, nous évaluerons individuellement les données contenues dans les zones d'inscription lorsqu'il faudra décider d'évaluer ou non l'essai pour publication. Nous jugerons un ensemble de données d'inscription insuffisant s'il y manque des zones ou si des zones contiennent de la terminologie qui n'informe pas. Si un chercheur a déjà inscrit un essai clinique à un registre public accessible pour le public et utilisant les zones de données que nous avons prescrites dans notre éditorial de 2004, nous considérerons que l'inscription est complète, à condition que chaque zone contienne des renseignements utiles.

Il importe de remplir les zones de données de façon acceptable. Cela ne devrait pas être le cas, mais ça l'est. Beaucoup d'entrées contenues dans la base de données clinical trials.gov accessible au public ne fournissent pas de renseignements significatifs dans certaines zones de données clés. Une recherche effectuée le 4 mai 2005 (Deborah Zarin, MD, communication personnelle) indique que certaines entrées de sociétés pharmaceutiques contiennent une expression qui ne veut rien dire (p. ex., «médicament à l'étude») au lieu du nom réel du médicament, même si une loi américaine oblige ceux qui inscrivent un essai à fournir le «nom de l'acte» ([www.fda.gov/cder/guidance/4856fnl.htm](http://www.fda.gov/cder/guidance/4856fnl.htm)). Beaucoup d'entreprises et d'autres entités remplissent les zones de données de façon significative. Les données entrées doivent inclure des renseignements qui représenteront une valeur pour les patients et les professionnels de la santé. Le nom de l'acte est nécessaire si l'on veut effectuer une recherche sur l'acte en question.

Nous reconnaissons que les registres d'essais cliniques servent à de nombreuses fins, mais quelles qu'elles soient, une norme uniforme mondiale sur une base de données minimale s'impose. Nous avons participé à l'effort déployé par l'OMS pour établir un processus d'inscription des essais significatifs sur le plan clinique. Le CIRRM appuie ce projet en cours. Lorsqu'il sera terminé, nous évaluerons le processus et s'il répond aux objectifs principaux, nous

l'adopterons. Nous avons énoncé dans l'éditorial de septembre 2004 nos exigences relatives à un registre acceptable des essais et elles n'ont pas changé. Il doit être possible d'effectuer des recherches électroniques dans le registre, qui doit être accessible gratuitement pour le public. Il doit être ouvert à tous les participants et à tous les organismes sans but lucratif. Il doit comporter un moyen d'assurer la validité des données sur l'inscription.

Un registre d'essais cliniques vise à promouvoir le bien public en assurant que chacun peut trouver de l'information clé au sujet de chaque essai clinique qui vise principalement à orienter la prise de décisions d'ordre médical. Nous ferons ce que nous pourrons pour aider à atteindre ce but. Nous exhortons tous les intéressés à inscrire les essais cliniques nouveaux et en cours. Lorsqu'on n'est pas certain qu'un essai est «cliniquement directif», il faut l'inscrire. Évitez les expressions vides de sens pour décrire les renseignements clés. Tous les participants à un essai et tous les chercheurs devraient se demander : «L'essai clinique est-il entièrement inscrit?»

Tous les auteurs sont membres du Comité international des rédacteurs de revues médicales. Catherine D. De Angelis, Rédactrice en chef, *JAMA*; Jeffrey M. Drazen, Rédacteur en chef, *New England Journal of Medicine*; Frank A. Frizelle, Rédacteur, *The New Zealand Medical Journal*; Charlotte Haug, Rédactrice en chef, *Norwegian Medical Journal*; John Hoey, Rédacteur, *CMAJ*; Richard Horton, Rédacteur, *The Lancet*; Sheldon Kotzin, Directeur de la rédaction, *MEDLINE*, National Library of Medicine; Christine Laine, Rédactrice adjointe principale, *Annals of Internal Medicine*; Ana Marušić, Rédactrice, *Croatian Medical Journal*; A. John P.M. Overbeke, Directeur de la rédaction, *Nederlands Tijdschrift voor Geneeskunde (Journal hollandais de la médecine)*; Torben V. Schroeder, Rédacteur, *Journal of the Danish Medical Association*; Harold C. Sox, Rédacteur, *Annals of Internal Medicine*; Martin B. Van Der Weyden, Rédacteur, *The Medical Journal of Australia*.

Intérêts concurrents : Aucun déclaré.

## Référence

1. De Angelis C, Drazen JM, Frizelle FA, Haug C, Hoey J, Horton R, et al. Clinical trial registration: a statement from the International Committee of Medical Journal Editors [éditorial]. *JAMC* 2004;171(6):606-7.

**Pour correspondance s'adresser au D<sup>r</sup> John Hoey, Rédacteur,**  
JAMC, 1867 prom. Alta Vista, Ottawa ON K1G 3Y6; fax 613  
565-5471; [john.hoey@cma.ca](mailto:john.hoey@cma.ca)
